# Supplementary material for: Complex Evolutionary and Genetic Patterns Characterize the Loss of Scleral Ossification in the Blind Cavefish Astyanax mexicanus
Source: PubMed Central journal article supplement (PMC4674125; doi:10.1371/journal.pone.0142208), 2015-12-09

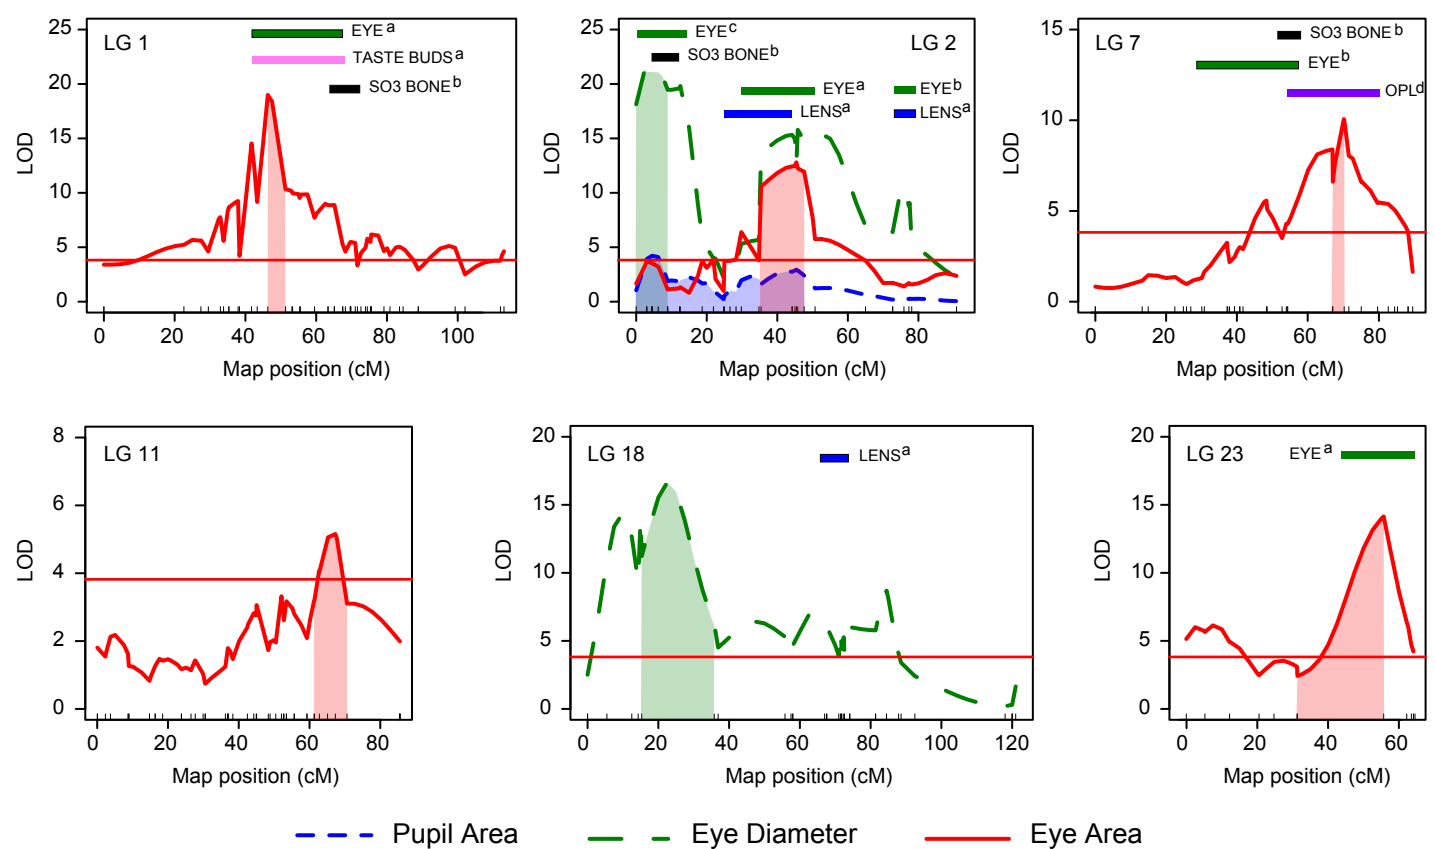

Supplement: pone.0142208.s001.pdf [file pone.0142208.s001.pdf]
